# Supplementary material
Source: MDPI journal article supplement (https://www.mdpi.com/2073-4395/8/10/205)
Supplement: s1 [file s1]

# Supplementary: Screening and Evaluation of Saline–Alkaline Tolerant Germplasm of Rice (*Oryza sativa* L.) in Soda Saline–Alkali Soil

Hao Wang <sup>1</sup>, Tetsuo Takano <sup>2</sup> and Shenkui Liu <sup>3,\*</sup>

<sup>1</sup> Alkali Soil Natural Environmental Science Center (ASNESC), Northeast Forestry University, Harbin 150040, China; haotian954@163.com

<sup>2</sup> Asian Natural Environmental Science Center, The University of Tokyo, Nishitokyo-shi, Tokyo 188-0002, Japan; takano@anesc.u-tokyo.ac.jp

<sup>3</sup> State Key Laboratory of Subtropical Silviculture, Zhejiang A & F University, Lin'an, Hangzhou 311300, China

\* Correspondence: shenkuiliu@nefu.edu.cn; Tel.: +86-451-8219-1394

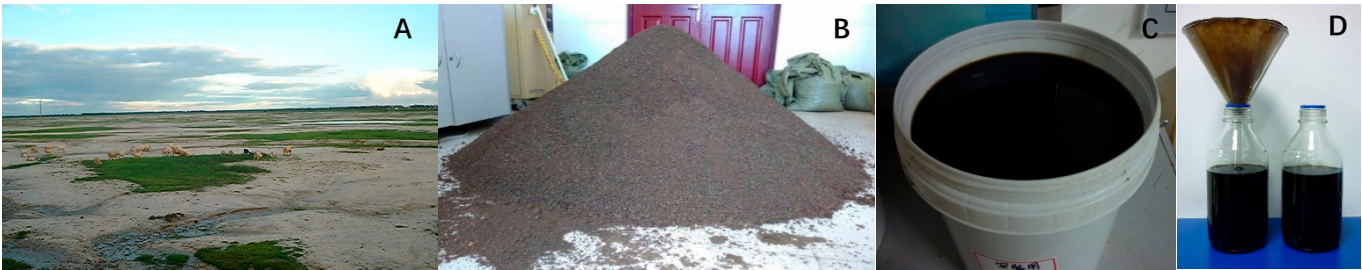

**Figure S1.** The obtainment of leachate. (A) The wild “barren” land. (B) The air-dried saline-alkaline soil after sieved and mixed adequately. (C) The stock solution of leachate. (D) The stock solution of leachate (left) and the solution for stress treatment (tap water: stock solution=3:1, volume) (right).

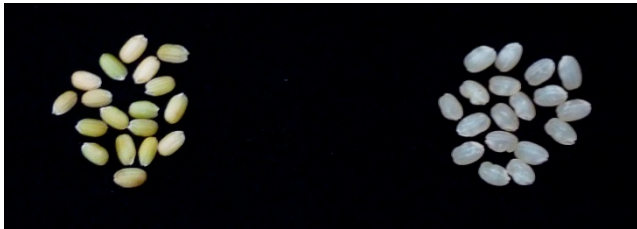

**Figure S2.** The rice quality of D36 (left) and D68 (right).

**Table S1.** The leachate’s essential characteristics.

| Leachate                      | EC ( $\mu\text{S}\cdot\text{cm}^{-1}$ ) | TDS (ppm) | pH       |
|-------------------------------|-----------------------------------------|-----------|----------|
| Stock solution                | 13260±180                               | 5550±40   | 9.9±0.03 |
| Tap water: Stock solution=3:1 | 4700±90                                 | 2290±20   | 9.0±0.02 |
| Normal Soil                   | 267.9±20                                | 69±5      | 7.3±0.02 |

The saline-alkaline soil was collected at 0-10 cm depth of wild “barren” lands. The normal soil was collected at 0-10 cm depth of under-forest soil of Harbin. The leachate was extracted from 2L saline-alkaline soil mixed with 4L of tap water. Independent triplicate measurements were averaged and the standard deviation (SD) was calculated.

**Table S2.** The maturity of D36 and D68 in the potting mixture.

| Variety No. | Repeat | Normal Soil (N.S.)      | 2/3 N.S.                | 1/2 N.S.                |
|-------------|--------|-------------------------|-------------------------|-------------------------|
|             | 1      | 12 <sup>th</sup> , Aug. | 16 <sup>th</sup> , Aug. | 28 <sup>th</sup> , Aug. |

|     |   |                         |                         |                         |
|-----|---|-------------------------|-------------------------|-------------------------|
| D36 | 2 | 12 <sup>th</sup> , Aug. | 18 <sup>th</sup> , Aug. | 28 <sup>th</sup> , Aug. |
|     | 3 | 12 <sup>th</sup> , Aug. | 18 <sup>th</sup> , Aug. | 28 <sup>th</sup> , Aug. |
|     | 1 | 3 <sup>rd</sup> , Aug.  | 8 <sup>th</sup> , Aug.  | 15 <sup>th</sup> , Aug. |
| D68 | 2 | 3 <sup>rd</sup> , Aug.  | 8 <sup>th</sup> , Aug.  | 15 <sup>th</sup> , Aug. |
|     | 3 | 5 <sup>th</sup> , Aug.  | 9 <sup>th</sup> , Aug.  | 15 <sup>th</sup> , Aug. |
